# Supplementary material for: Cultivar and Postharvest Storage Duration Influence Fruit Quality, Nutritional and Phytochemical Profiles of Soilless-Grown Cantaloupe and Honeydew Melons
Source: MDPI journal article supplement (doi:10.3390/plants11162136), 2022-08-17
Supplement: s1 [file s1]

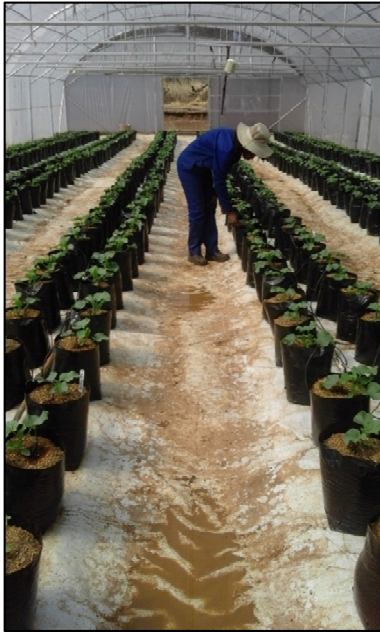

**Figure S1:** Experimental layout of sweet melon cultivar trial in a non-temperature controlled plastic tunnel

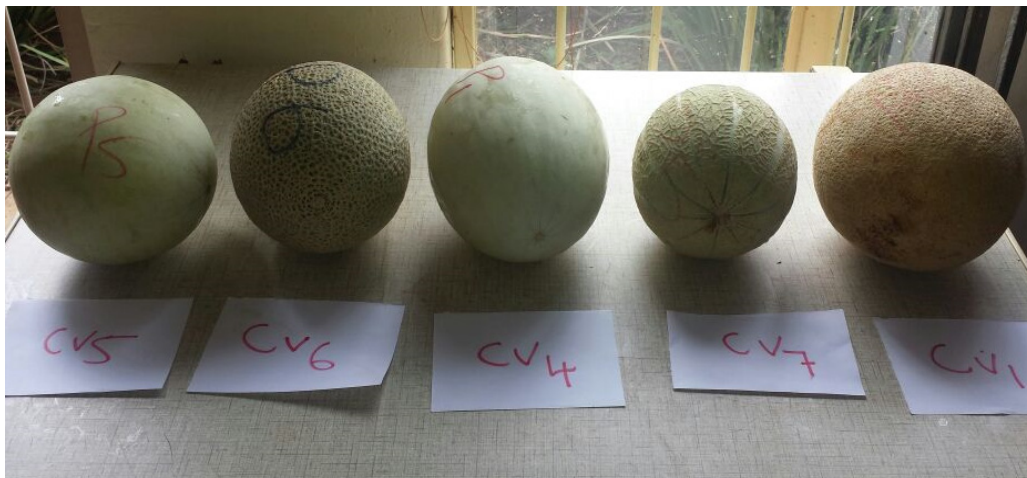

**Figure S2:** Sweet melon cultivars used for postharvest storage. CV1 = Majestic; CV4 = Honey Brew; CV5 = Honey Star; CV6 = Cyclone; CV7 = MAB79001.

**Table S1.** Eigenvectors from principal component (PC) analysis based on the nutritional and phytochemical quality at harvest.

| Traits                     | PC1    | PC2    | PC3    | PC4    |
|----------------------------|--------|--------|--------|--------|
| K                          | 0.334  | -0.174 | -0.285 | 0.375  |
| P                          | 0.430  | 0.016  | -0.284 | 0.103  |
| Mg                         | 0.371  | 0.271  | 0.170  | -0.055 |
| Ca                         | 0.308  | 0.042  | 0.388  | 0.106  |
| Zn                         | 0.420  | 0.104  | 0.012  | 0.056  |
| β-Carotene                 | 0.371  | 0.181  | -0.371 | -0.100 |
| Vitamin C                  | 0.320  | -0.110 | 0.390  | -0.060 |
| Total phenolics            | 0.050  | 0.374  | 0.504  | -0.129 |
| Flavonoids                 | 0.173  | -0.537 | 0.187  | -0.338 |
| FSA(M)                     | -0.074 | -0.204 | 0.280  | 0.808  |
| FSA(W)                     | -0.130 | 0.607  | -0.048 | 0.183  |
| Eigenvalue                 | 4.443  | 2.296  | 1.549  | 1.078  |
| Variability (%)            | 40.394 | 20.877 | 14.081 | 9.796  |
| Cumulative variability (%) | 40.394 | 61.271 | 75.352 | 85.148 |

K = potassium; P = phosphorus; Mg = magnesium; Ca = calcium; Zn = zinc; FSA (W) = free radical scavenging activity of water extract; FSA (M) = free radical scavenging activity of 50% methanol extract

**Table S2.** Contribution (%) of each variable to the principal components.

| Traits          | PC1    | PC2    | PC3    | PC4    |
|-----------------|--------|--------|--------|--------|
| K               | 11.184 | 3.029  | 8.103  | 14.049 |
| P               | 18.474 | 0.025  | 8.056  | 1.051  |
| Mg              | 13.730 | 7.350  | 2.886  | 0.305  |
| Ca              | 9.465  | 0.178  | 15.049 | 1.116  |
| Zn              | 17.674 | 1.085  | 0.013  | 0.313  |
| β-Carotene      | 13.781 | 3.285  | 13.771 | 1.010  |
| Vitamin C       | 10.215 | 1.216  | 15.179 | 0.364  |
| Total phenolics | 0.253  | 13.973 | 25.357 | 1.654  |
| Flavonoids      | 3.002  | 28.881 | 3.501  | 11.458 |
| FSA(M)          | 0.542  | 4.170  | 7.859  | 65.326 |
| FSA(W)          | 1.679  | 36.809 | 0.226  | 3.353  |

K = potassium; P = phosphorus; Mg = magnesium; Ca = calcium; Zn = zinc; FSA (W) = free radical scavenging activity of water extract; FSA (M) = free radical scavenging activity of 50% methanol extract

**Table S3.** Changes (%) in total soluble solid and total phenolic contents as influenced by postharvest storage duration.

| Postharvest storage duration | Total soluble solid | Total phenolic content |
|------------------------------|---------------------|------------------------|
| 7 days                       | 4.2                 | -27.8                  |
| 14 days                      | 10.0                | -36.1                  |

Positive and negative values indicate percentage increases and decreases, respectively.

**Table S4.** Changes (%) in fruit quality parameters, nutritional and phytochemical contents as influenced by postharvest storage duration.

| Cultivar   | Flavonoid |       | Vitamin C |       | $\beta$ -Carotene |       | FSA (W) |      | FSA (M) |       | Colour $L^*$ |      | pH   |      |
|------------|-----------|-------|-----------|-------|-------------------|-------|---------|------|---------|-------|--------------|------|------|------|
|            | 7 d       | 14 d  | 7 d       | 14 d  | 7 d               | 14 d  | 7 d     | 14 d | 7 d     | 14 d  | 7 d          | 14 d | 7 d  | 14 d |
| Cyclone    | 231.9     | 258.4 | -23.8     | -32.7 | -20.2             | -33.9 | 9.0     | 17.7 | 1.0     | 3.7   | 4.9          | 16.0 | 13.8 | 18.6 |
| Honey Brew | 382.0     | 362.9 | -2.9      | -4.2  | 0.0               | -1.4  | 6.6     | 41.5 | 1.9     | 2.0   | -1.8         | 4.7  | 4.9  | 25.8 |
| Honey Star | 212.1     | 328.2 | -44.2     | -46.0 | -10.8             | -42.5 | 2.2     | 28.9 | 2.4     | 3.7   | 7.0          | 6.3  | -9.6 | -3.1 |
| MAB79001   | 600.6     | 611.0 | -18.8     | -20.2 | -1.4              | -7.3  | 18.1    | 21.1 | 0.5     | -10.3 | 8.8          | 21.4 | 2.4  | 15.9 |
| Majestic   | -5.1      | 3.6   | -23.4     | -24.6 | -14.6             | -31.0 | 12.6    | 12.8 | 1.0     | 5.2   | 9.7          | 13.9 | 4.3  | 4.2  |

Positive and negative values indicate percentage increases and decreases, respectively. FSA (W) = free radical scavenging activity of water extract; FSA (M) = free radical scavenging activity of 50% methanol extract; d = days.
